# Supplementary material
Source: PubMed Central journal article supplement (PMC2781583)
Supplement: supp_M109.051201_jbc.M109.051201-1.pdf [file supp_M109.051201_jbc.M109.051201-1.pdf]

**LIGAND-DEPENDENT COREPRESSOR LCoR IS AN ATTENUATOR OF  
PROGESTERONE-REGULATED GENE EXPRESSION**

**Ana Palijan<sup>1</sup>, Isabelle Fernandes<sup>1</sup>, Mark Verway<sup>1</sup>, Maria Kourelis<sup>1</sup>, Yolande Bastien<sup>1</sup>, Luz E. Tavera-Mendoza<sup>3</sup>, Aaron Sacheli<sup>1</sup>, Veronique Bourdeau<sup>4</sup>, Sylvie Mader<sup>4</sup>, and John H. White<sup>1,2</sup>**

Departments of Physiology<sup>1</sup> and Medicine<sup>2</sup>, McGill University, Montreal Quebec H3G 1Y6, Canada; Department of Adult Oncology, Dana-Farber Cancer Institute<sup>3</sup>, Harvard Medical School, Boston, Massachusetts 02115, USA; Institute for Research in Immunology and Cancer and Biochemistry Department<sup>4</sup>, University of Montreal, C.P. 6128, Succursale Centre Ville, Montreal, Quebec H3C 3J7, Canada

Running head: LCoR is a corepressor of progesterone-regulated gene expression

Address correspondence to: John H. White, PhD, Department of Physiology, McGill University, 3655 Drummond St., Montreal, Quebec, H3G 1Y6, Canada. Tel: 514 398 8498; Fax: 514 398 7452; email: [john.white@mcgill.ca](mailto:john.white@mcgill.ca)

**Supplemental Material**

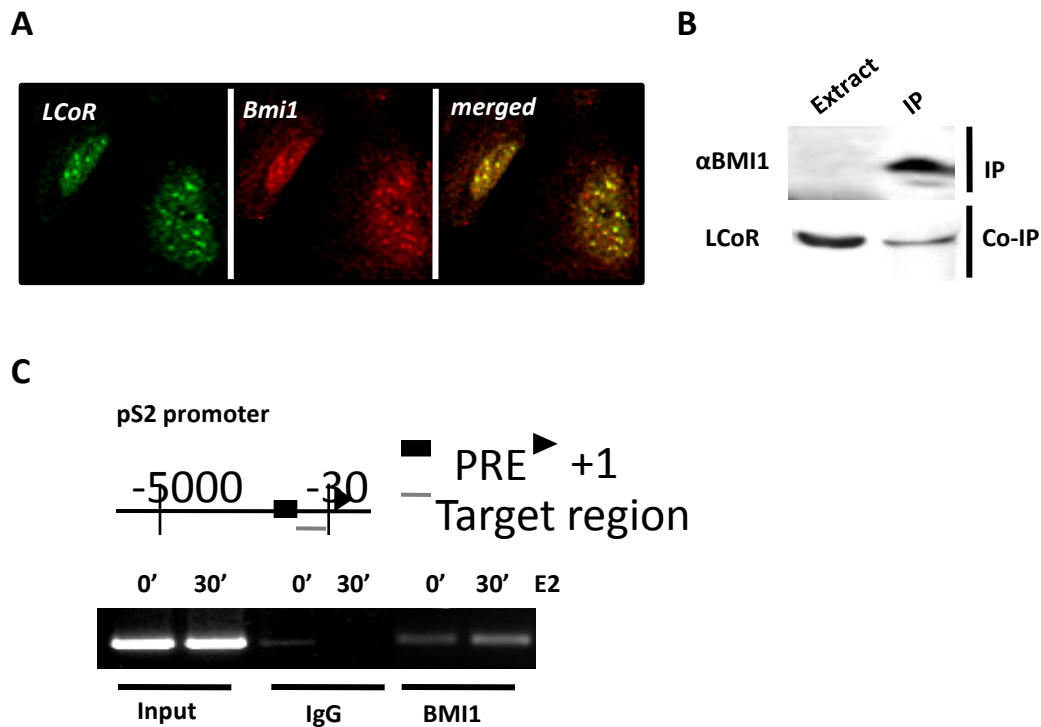

**Supplemental Fig. 1.** Association of LCoR with PRC1 complex marker BMI1. A. Confocal microscopic analysis of the subcellular colocalization of LCoR with BMI1 by immunocytochemistry (see Experimental Procedures for details). B. Analysis of the association of LCoR with BMI1 by coimmunoprecipitation (Co-IP). Extracts of MCF7 cells were immunoprecipitated (IP) with antibodies against BMI1, and probed by Western blotting for enrichment of target proteins in immunoprecipitates. Immunoprecipitates were also probed for the coimmunoprecipitation of LCoR. C. ChIP assays in extracts of MCF7 cells treated with E2 for 30 min. (10nM). The pS2 promoter region is depicted (upper panel). Cell extracts were collected and immunoprecipitated with IgG, or antibody against BMI1.

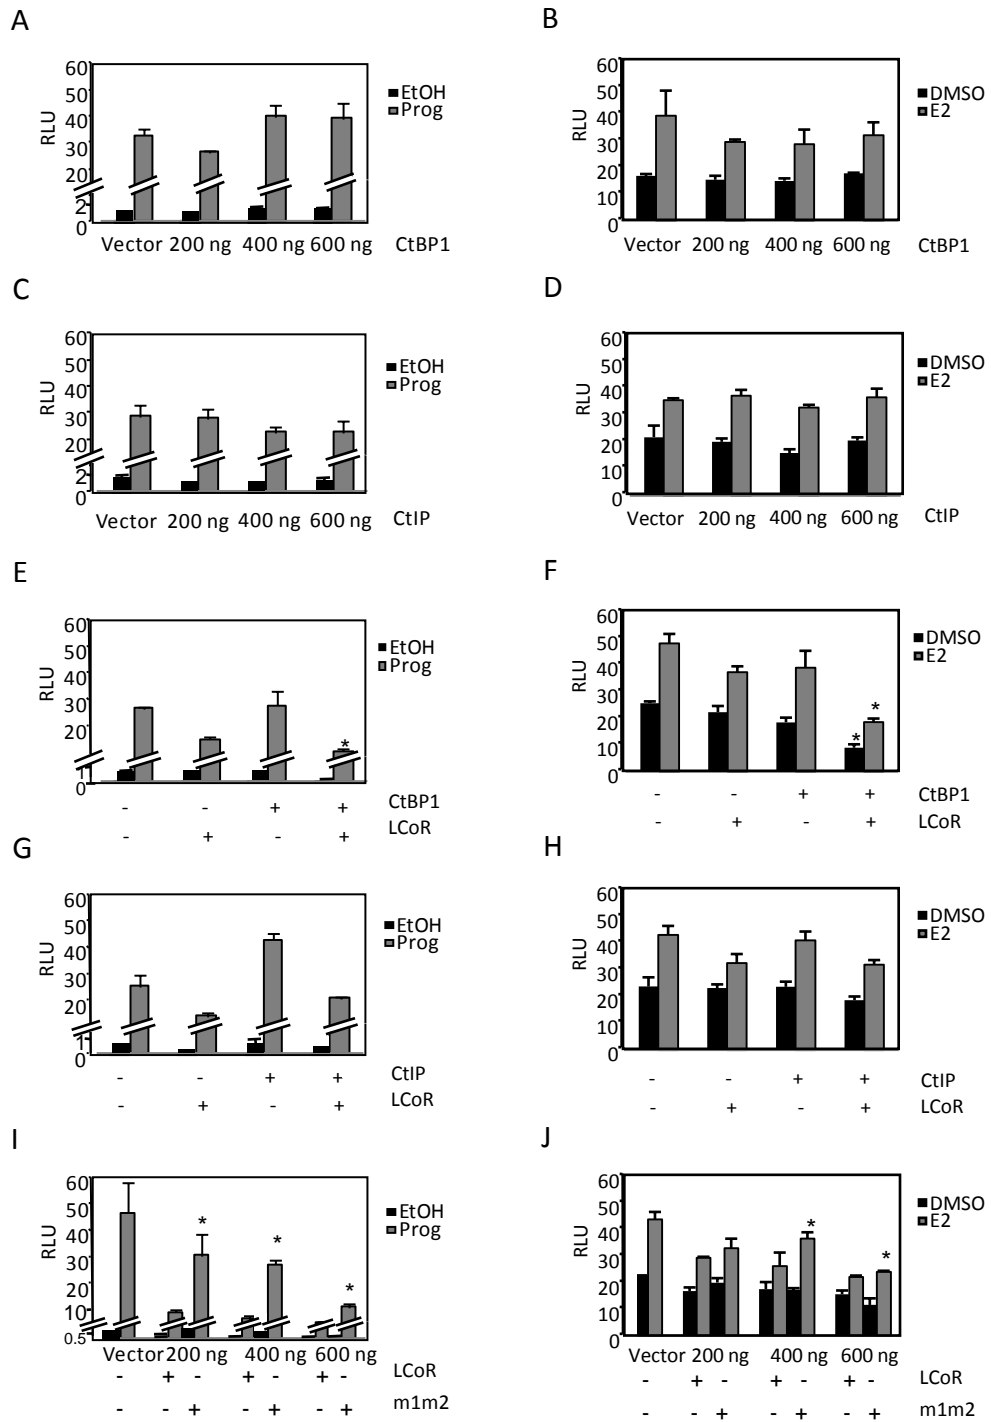

**Supplemental Fig. 2.** Roles of CtBP1 and CtIP in LCoR-dependent corepression in T47D cells. Cells were transiently transfected with expression vectors for either PR (100ng) or ER $\alpha$  (100ng) and their corresponding reporter plasmids (250ng) for 18h. Media was then changed and cells were treated with vehicle or hormone for 30h. A and B. Dose-response curves analyzing the effects of CtBP1 on reporter gene expression in cells treated with P4 (10nM; A) or E2 (10nM; B). Increasing amounts of CtBP1 were transfected (200, 400 and 600ng). C and D. Dose-response curves analyzing the effects of CtIP on reporter gene expression in cells treated with P4 (C) or E2 (D). Increasing amounts of CtIP1 were transfected (200, 400 and 600ng). E and F. Analysis of the effects of coexpression of LCoR and CtBP1 on hormone-dependent gene expression. Cells were transiently transfected with either vector alone, LCoR alone (100ng), CtBP1 alone (200ng) or with both LCoR and CtBP1, and treated with P4 (E) or E2 (F). \*,  $P < 0.05$  for results of LCoR and CtBP1 coexpression versus empty vector control. G and H. Analysis of the effects of coexpression of LCoR and CtIP on hormone-dependent gene expression. Cells were transiently transfected with either vector alone, LCoR alone, CtIP1 alone or with both LCoR and CtIP1 and treated with P4 (G) or E2 (H). I and J. Dose response curves of either LCoR or m1m2 in cells treated with P4 (I) or E2 (J). Increasing amounts of wild-type or mutant LCoR were transfected (200, 400 and 600ng). \*,  $P < 0.05$  for results of corresponding wild-type LCoR versus mutant form m1m2.

ChIP and reChIP primer sequences

| <b>Name</b>              | <b>Sequence</b>                   |
|--------------------------|-----------------------------------|
| BMP7                     | Forward TGCAGACGACGAAAAATCAG      |
|                          | Reverse AGGGGTGGGAGGTTTAGATG      |
| BMP7 non-target control  | Forward CGCTATCAGTCACCCCATT       |
|                          | Reverse CGAAAAGGCTTTGAGATTGC      |
| IGFBP1                   | Forward GAGACGCTTTGCAGGAGA        |
|                          | Reverse TTGCACCAGGAGGTTAATGA      |
| IGFBP1 on-target control | Forward CTCCCTGATCACAGCTCTCC      |
|                          | Reverse TCTGGAGGGGCAGTTAAGAA      |
| pS2                      | Forward CTCTCACTATGAATCACTTCTGCAG |
|                          | Reverse AGATAACATTTGCCtAAGGAGGCC  |
| pS2 non-target control   | Forward CAGCCCCCAAGAACTTCCAG      |
|                          | Reverse TGAGCAGGTTTGCAGCACACTT    |

**Supplemental Table 1.** ChIP and reChIP primer sequences.

QRT-PCR primer sequences

| Name           | Sequence                         |
|----------------|----------------------------------|
| BMP7           | Forward GGTCATGAGCTTCGTCAACC     |
|                | Reverse GCAGGAAGAGATCCGATTCC     |
| CYP26B1        | Forward ACATCCACCGCAACAAGC       |
|                | Reverse GGATCTTGGGCAGGTAACTCT    |
| FKBP51         | Forward AAAAGGCCAAGGAGCACAAC     |
|                | Reverse TTGAGGAGGGGCCGAGTTC      |
| GREB1          | Forward CCACAAAGGGTGGTCTCCAGAA   |
|                | Reverse CACTGGCTTGGCCTTGCATATT   |
| IGFBP1         | Forward GGGACGCCATCAGTACCTATG    |
|                | Reverse GGCAGGGCTCCTTCCATTT      |
| KRT4           | Forward GCCGACAATGACTTTGTGGT     |
|                | Reverse CCTCCAACCTCCACCTGTTC     |
| MUC1           | Forward GCAAGAGCACTCCATTCTCAATT  |
|                | Reverse TGGCATCAGTCTTGGTGCTATG   |
| pS2            | Forward ACCATGGAGACAAGGTGAT      |
|                | Reverse AAATTCACACTCCTCTTCTG     |
| SGK3           | Forward CAAAAGAAGATTCCACCACCA    |
|                | Reverse TGTCAAAGTTTCTGATATCATCTC |
| $\beta$ -actin | Forward GGCATGGGTCAGAAGGATTCC    |
|                | Reverse GCTGGGGTGTGAAGGTCTC      |

**Supplemental Table 2.** QRT-PCR primer sequences.
